# Supplementary material
Source: Springer Nature journal article supplement (https://www.springermedizin.de/resource/supplementary/13019_2009_214_MOESM5_ESM.pdf/9638090)

# SUPEROXIDE RADICAL assay

pmole/mg

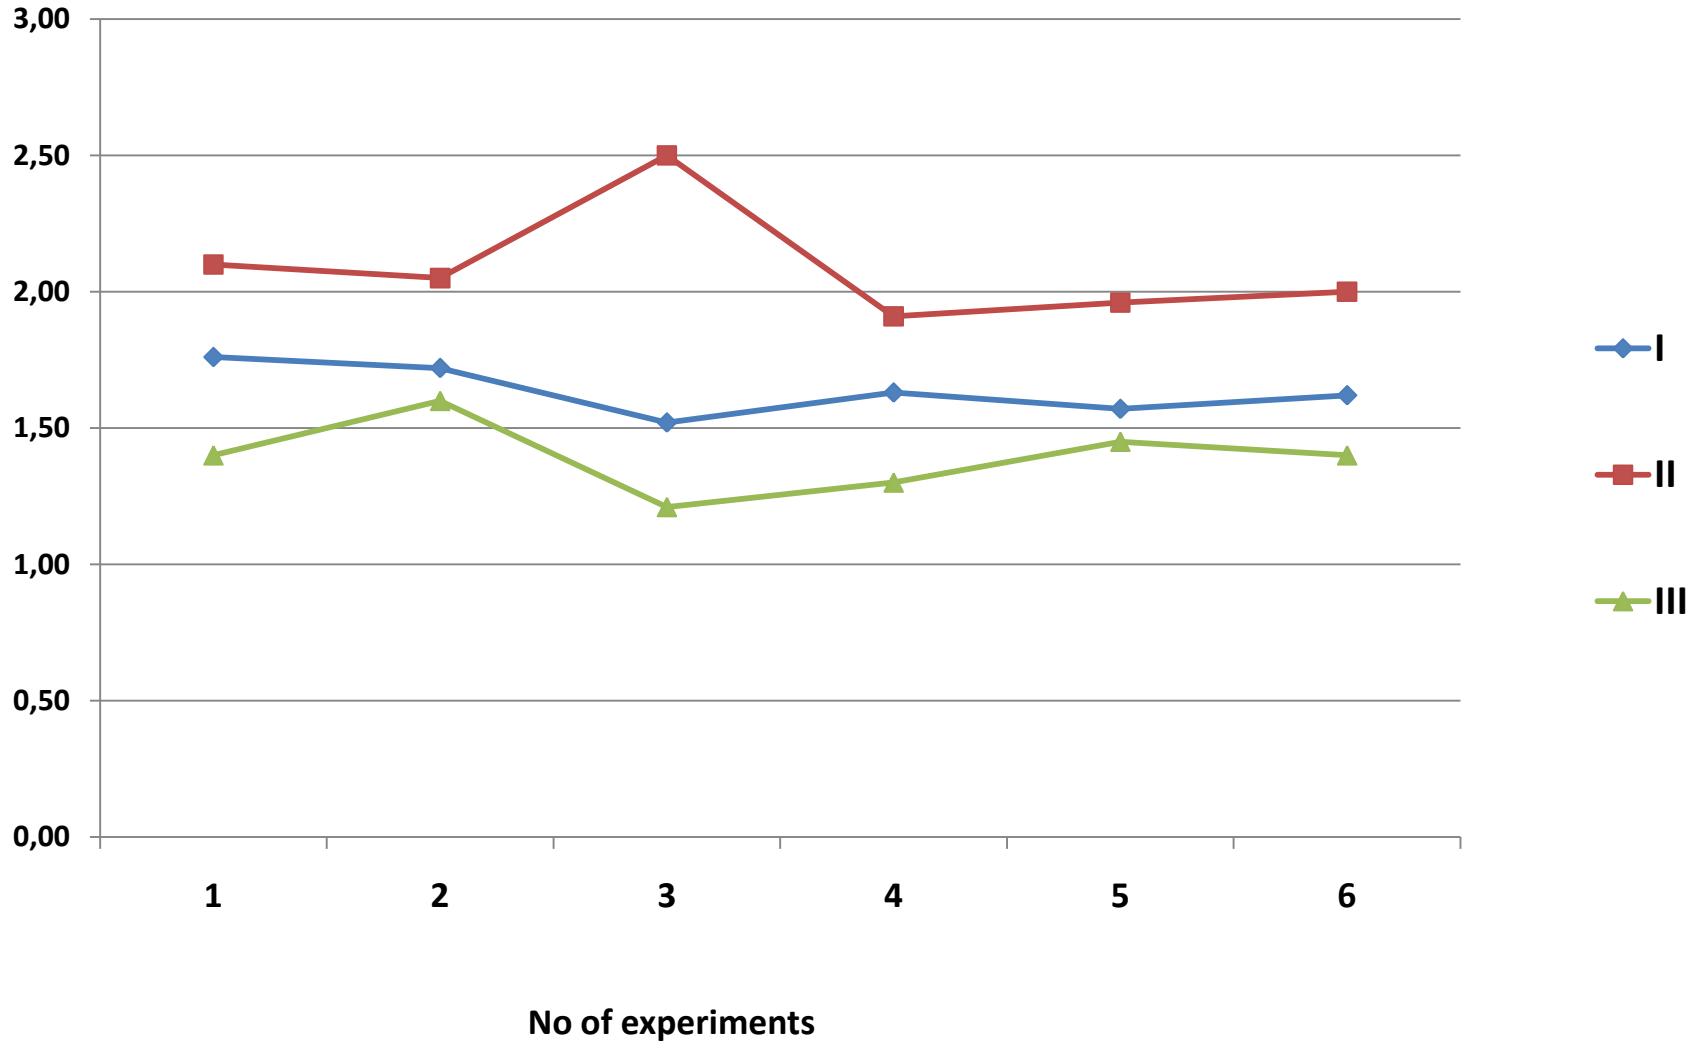

Supplement: MOESM5 [file 9638090]
